## RESEARCH ARTICLE

# Metabolic and inflammatory profiles, gut microbiota and lifestyle factors in overweight and normal weight young Thai adults

Surasawadee Somnuk<sup>1</sup>, Surat Komindr<sup>2</sup>, Sudjai Monkhai<sup>3</sup>, Thitirat Poolsawat<sup>4</sup>, Massalin Nakphaichit<sup>4</sup>, Bandhita Wanikorn<sup>4\*</sup>

**1** Department of Sports and Health Sciences, Faculty of Sports Science, Kasetsart University, Kamphaeng Saen Campus, Nakhon Pathom, Thailand, **2** Division of Nutrition and Biochemical Medicine, Department of Medicine, Faculty of Medicine, Ramathibodi Hospital, Mahidol University, Bangkok, Thailand, **3** Wangnumkeaw Sub-district Health Promotion Hospital, Nakhon Pathom, Thailand, **4** Department of Biotechnology, Faculty of Agro-Industry, Kasetsart University, Bangkok, Thailand

☉ These authors contributed equally to this work.

\* fagibtw@ku.ac.th

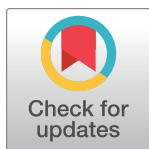

## OPEN ACCESS

**Citation:** Somnuk S, Komindr S, Monkhai S, Poolsawat T, Nakphaichit M, Wanikorn B (2023) Metabolic and inflammatory profiles, gut microbiota and lifestyle factors in overweight and normal weight young Thai adults. PLoS ONE 18(7): e0288286. <https://doi.org/10.1371/journal.pone.0288286>

**Editor:** Erwin G. Zoetendal, Wageningen Universiteit, NETHERLANDS

**Received:** October 11, 2022

**Accepted:** June 24, 2023

**Published:** July 14, 2023

**Copyright:** © 2023 Somnuk et al. This is an open access article distributed under the terms of the [Creative Commons Attribution License](https://creativecommons.org/licenses/by/4.0/), which permits unrestricted use, distribution, and reproduction in any medium, provided the original author and source are credited.

**Data Availability Statement:** The raw 16S amplicon sequences used in this study have been deposited at the NCBI shorts read archive (SRA) with the Bio Project accession number PRJNA877411 (<https://www.ncbi.nlm.nih.gov/bioproject/PRJNA877411>).

**Funding:** BW received financial support from Kasetsart University Research and Development Institute (KURDI), Thailand (grant number FF(KU) 13.65). <https://www.ku.ac.th/en/ku-research-and->

## Abstract

Obesity among young adults, especially those living in developing countries is increasing. A high body mass index (BMI) is one of the major causes of several diseases worldwide, constituting an important risk factor for non-communicable diseases (NCDs). Investigations describing the relationship between BMI, clinical and gut microbiota characteristics and lifestyle factors of overweight young adults, especially from Southeast Asian countries are limited. Metabolic and inflammatory biomarkers, fecal microbiota profiles and lifestyle factors were compared between overweight Thai young adults ( $n = 30$ , mean age  $33 \pm 9.48$ ) and those with normal weight ( $n = 30$ , mean age  $27 \pm 7.50$ ). This study was registered with the Thai Clinical Trials Registry (TCTR20220204007). Health status including body composition, fasting glucose and insulin, lipid profiles, liver and kidney function, inflammatory biomarkers, blood pressure and fecal microbiota using 16S rRNA gene sequencing data was determined. Dietary intake was assessed using a 3-day dietary record and a food frequency questionnaire (FFQ), with physical activity levels compared using the international physical activity questionnaire (IPAQ). The overweight group had significantly higher BMI, waist-hip ratio, body fat mass, % body fat, skeletal mass, triglyceride level, C-reactive protein, insulin and blood pressure, with lower levels of high-density lipoprotein cholesterol (HDL-C) and blood urea nitrogen compared to the normal weight group. Significant differences in fecal microbiota composition at the family and genus levels were observed between the two groups. In our clinical setting, we also observed that unhealthy diets with high consumption of food rich in fat and sugar, processed meat and alcohol, and physical inactivity were associated with an increased prevalence of overweight in Thai young adults. Results provided the big picture of health and lifestyle characteristics of overweight young Thai people. Young adults should be encouraged to engage in health-promoting activities that maintain healthy bodyweight.

[development-institute/](#). The funders had no role in study design, data collection and analysis, decision to publish, or preparation of the manuscript.

**Competing interests:** The authors have declared that no competing interests exist.

## Introduction

Non-communicable diseases (NCDs), principally cardiovascular disease, cancer and diabetes are the leading cause of death globally and a major contributor to disability [1, 2]. Compelling epidemiological and clinical evidence suggests that overweight and obesity increase the risk of NCDs by over 3-fold compared to those with normal body weight [3, 4]. The prevalence of obesity among young adults in developing countries ranges from 2.3 to 12%, with overweight as high as 28.8% [5]. Obese and overweight people whose weight reduced between early adulthood and midlife halved their risk of dying during the follow-up period [6].

Physical inactivity and dietary habits are the main risk factors contributing to obesity [7–9]. Excess consumption of foods high in energy and low in essential nutrients contributes to overweight or obesity among working-age adults [10]. A physically inactive lifestyle triggers weight gain and vice versa, independent of genetic effects [11]. Lifestyle modifications are still the most widely used and recommended methods to achieve weight reduction, particularly using different dietary strategies while simultaneously undertaking physical activity and exercise [12, 13].

Multiple factors interact in the progress of obesity but gut microbiota play a critical role as bodyweight regulators affecting adiposity and glucose metabolism [14]. Individuals with elevated body mass index (BMI) and adiposity exhibited significantly lower diversity in gut bacteria than those with normal BMI [15]. Physical activity and diet modify gut microbiota composition by increasing microbial diversity [15, 16].

Metabolic biomarker profiles, gut microbiota characteristics and dietary intake of overweight middle-aged and older adults in developing countries are available [17–19] but lack of data exist for overweight Thai young adults. Therefore, this study characterized metabolic and inflammatory biomarkers and gut microbiota profiles of overweight young Thai adults and compared the results to those with normal weight to identify lifestyle factors such as physical activity and dietary patterns within the subject cohort.

## Materials and methods

### Ethics statement

This study was approved by the Ethics Committee of Kasetsart University (License number COA64/068) and registered with the Thai Clinical Trials Registry (TCTR20220204007). Written informed consent was obtained from all participants. The protocol for this trial and supporting CONSORT checklist are available as supporting information; see [S1 Checklist](#) and [S1 File](#).

### Study design and subjects

Sixty subjects aged 20–40 were recruited in March 2022 from Nakhon Pathom Province, Central Thailand via word of mouth, flyers and posters on the Kasetsart University Campus as well as in shops and community buildings in the surrounding area. Email advertisements were sent to Kasetsart University students and staff. Individuals who responded to the advertisements were asked to complete a health and lifestyle questionnaire online or by telephone. Those who fitted the inclusion criteria were invited to the clinical unit for assessment of further inclusion/exclusion criteria ([Fig 1](#)). Inclusion criteria were: free from chronic diseases, including cardiovascular disease, diabetes, cancer, and inflammatory or digestive disorders, and had not taken medications, antibiotics or probiotics within three months before participating in the study that might affect lipids, blood clotting or gut microbiota. Exclusion criteria were: asthmatics and consuming more than 21 U/week of alcohol. Subjects who were pregnant and/or

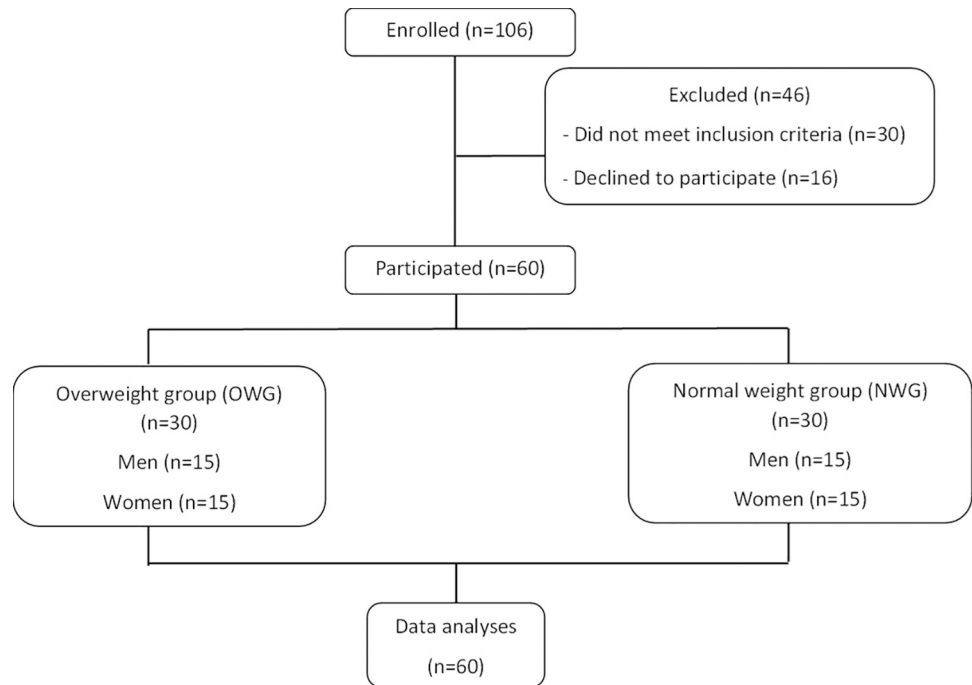

**Fig 1. Summary of the recruitment process and study execution.**

<https://doi.org/10.1371/journal.pone.0288286.g001>

breastfeeding were also excluded from the study. The aim of this study was to identify metabolic and inflammatory biomarkers and gut microbiota profiles, and lifestyles of young Thai adults based on their body mass index (BMI). The volunteers were divided into two groups based on the WHO Asian BMI and waist-to-hip ratio (WHR) classification criteria for adults as 30 with normal weight (BMI 18.5–22.9 kg/m<sup>2</sup>, WHR male  $\geq$  0.95, female  $\geq$  0.8) and 30 overweight (BMI 23–29.9 kg/m<sup>2</sup>, WHR male < 0.95, female < 0.8). Data of 60 Thai young adults were analyzed for body composition, blood profiles, fecal microbiota, diet habits and physical activity levels.

### Anthropometric measurements

The auxological assessment included height measured by a Harpenden Stadiometer, and weight and body composition assessed via bioelectrical impedance using an Inbody 720 Analyzer. Body composition data of interest comprised total percentage of body fat, body fat mass, and skeletal mass. BMI was computed as weight (in kg) divided by the square of the height in meters [weight/(height)<sup>2</sup>]. Waist circumference (WC) was measured using a Hoehchstmass body tape measure at the approximate midpoint between the lower margin of the last palpable rib and the top of the iliac crest. Hip circumference (HC) was measured at the level of greater trochanters, and waist-to-hip ratio (WHR) was calculated as WC (cm) divided by HC (cm).

### Blood pressure measurement

Systolic (SBP) and diastolic blood pressure (DBP) were measured twice with a validated automatic digital blood pressure monitor (OMRON HEM-8712). The average of two readings was used for analysis.

## Analysis of biochemical variables

Blood samples were obtained after overnight fasting lasting at least 10 h. Blood samples obtained via single venepuncture were collected into heparin and EDTA vacutainers (BD). Fasting plasma glucose (FPG) in NaF plasma was measured using the enzymatic (Hexokinase/G-6-PDH) method (Abbott Alinity system, Abbott Park, Illinois, USA). The serum from blood was measured for total cholesterol (TC) using the enzymatic method (Abbott Alinity system, Abbott Park, Illinois, USA), high-density lipoprotein cholesterol (HDL-C) and low-density lipoprotein cholesterol (LDL-C) using accelerator selective detergent method (Abbott Alinity system, Abbott Park, Illinois, USA) and triglycerides (TG) using glycerol phosphate oxidase method (Abbott Alinity system, Abbott Park, Illinois, USA). Insulin (INS) values were analyzed based on a chemiluminescent microparticle immunoassay (CMIA) (Abbott Alinity system, Abbott Park, Illinois, USA). Liver function tests were performed with measurements of serum glutamic oxaloacetic transaminase (SGOT) and serum glutamic pyruvate transaminase (SGPT) from serum without hemolysis by enzymatic NADH (with P-5'-P) method (Abbott Alinity system, Abbott Park, Illinois, USA). Kidney function tests were determined with blood urea nitrogen (BUN) and creatinine (CRE) using the urease and enzymatic method (Abbott Alinity system, Abbott Park, Illinois, USA). C-reactive protein (CRP) was also analyzed as an inflammation marker using turbidimetric/immunoturbidimetric (Abbott Alinity system, Abbott Park, Illinois, USA).

## Lifestyle assessment

Two lifestyle factors were investigated as diet and physical activity. Habitual dietary intakes were collected from study subjects using three-day dietary records (3DDR) and semi-quantitative food frequency questionnaires (FFQ). For 3DDR, each dietary report encompassed an itemized nutritional intake recorded during two weekdays (Monday to Friday) and one weekend. Subjects were shown examples of serving sizes for food and given guidance on their intake recording for each meal. The diet record form consisted of columns to note the meal type/time, type of food, amount, cooking methods, and place. Subjects were required to submit the food record for analysis of mean daily caloric and macronutrient intakes calculated using INMUCAL-Nutrients version 4 software (Institute of Nutrition, Mahidol University, Thailand). For FFQ, subjects were asked to record the frequency of consumption of each food [20]. Physical activity levels were assessed using the International Physical Activity Questionnaire (IPAQ) [21]. The FFQ and IPAQ for this cross-sectional study are available as supporting information; see [S2](#) and [S3 Files](#).

## Fecal sample collection

Fecal samples of all volunteers (approximately 10 g) were collected in a sterilized container, frozen immediately and/or transported with ice packs to the laboratory within 4 h of collection. The samples were stored at -80°C until further use.

## Genomic DNA extraction

Genomic DNA was extracted using the QIAamp DNA Fast Stool Mini Kit (Qiagen, Hilden, Germany) in accordance with protocol Q of the international human microbiome standard (IHMS). Each fecal sample was homogenized and rinsed twice with phosphate-buffered saline (PBS) pH 8 (1:5 w/v). The fecal pellet was then resuspended in 1.5 mL of ASL lysis buffer (Qiagen, Hilden, Germany) and transferred to a 2 mL screw cap tube containing sterile zirconia beads with diameters of 0.1 mm and 1 mm, weighing 0.3 g for each size (BioSpec, Bartlesville,

OK, USA). Physical disruption of microbial cells was performed by running a FastPrep-24 benchtop instrument (MP Biomedicals, Santa Ana, CA, USA) at maximum speed for 8 minutes and 30 seconds, with a series of 5 minutes resting on the ice for every minute of beating. The purity and quantity of DNA were determined using a Nanodrop 2000c (Thermo Scientific, Waltham, MA, USA). The genomic DNA was stored at  $-20^{\circ}\text{C}$  until further analysis.

### Fecal microbiome analysis

Fecal microbiota are conventionally analyzed using 16S rRNA gene sequencing data. The genomic DNA of each sample was sent for sequencing to the outsource company (Novogene Co., Ltd., Beijing, China). The sequencing process was carried out by amplifying the V3-V4 region of the 16s rRNA gene using forward primer 341F (CCTAYGGGRBGCASCAG) and reverse primer 806R (GGACTACNNGGTATCTAAT). The barcode sequences were integrated with a forward primer at the 5' end. Amplification was performed by using Phusion® High-Fidelity PCR Master Mix (New England Biolabs, Ipswich, MA, USA) under the following conditions: Initial denaturation at  $95^{\circ}\text{C}$  for 2 min; 35 amplification cycles of  $95^{\circ}\text{C}$  for 30 s,  $57^{\circ}\text{C}$  for 30 s,  $72^{\circ}\text{C}$  for 30 s and a post-extension at  $72^{\circ}\text{C}$  for 10 min. The PCR product was mixed with 1X loading buffer containing SYBR Green dye and run in 2% agarose, 80 V, 40 min. Samples with a bright band between 400 and 450 bp were mixed at an equidensity ratio and purified with Qiagen Gel Extraction Kit (Qiagen, Hilden, Germany). Sequencing libraries were prepared using NEBNext® Ultra™ DNA Library Prep Kit for Illumina (New England Biolabs, Ipswich, MA, USA) according to the manufacturer's recommendation. The library quality was assessed on a Qubit 2.0 Fluorometer (Thermo Scientific, Waltham, MA, USA) and Agilent Bioanalyzer 2100 system (Agilent Technologies, Santa Clara, CA, USA). The library was then sequenced on Illumina NovaSeq 6000 (Illumina, San Diego, CA, USA).

### Bioinformatics

Paired-end reads were assigned to each sample based on the previously linked barcode sequence. Reads were merged into a single sequence and the primers were trimmed using the `search_pcr2` command in USEARCH v11.0.667 [22]. Merged reads shorter than 300 bp or having expected errors higher than 1.0 were discarded. The remaining quality-filtered reads were corrected for sequence errors by implementing the UNOISE algorithm [23]. An amplicon sequence variances (ASVs) table was produced with USEARCH and then mapped with the representative sequence to obtain the abundance. Taxonomy was assigned using the SINTAX algorithm [24] and Ribosomal Database Project (RDP) training set v18 database [25] with an 80% identity cut-off. Microbial diversity metrics were calculated from the ASVs table with USEARCH. The alpha diversity was determined by calculating the Shannon, Chao1, and Pielou's index, whereas the beta diversity metric was calculated based on the Bray-Curtis dissimilarity.

### Sample size

A mean reduction in HDL-C was chosen as a clinically significant end point, since it has been strongly associated with and largely attributable to obesity [26, 27]. The power calculation was based on a known mean overweight Thai adult HDL-C of 42.57 mg/dL and standard deviation of 6.37mg/dL [17]. A sample of 60 participants would have at least 80% power at 5% level of significance (two-sided) to detect a difference in HDL-C between the normal and overweight Thai adults.

## Statistical analysis

Statistical analyses were performed using SPSS® (version 26.0; SPSS Inc., Armonk, NY, USA). All statistical tests were a 5% significance level maintained throughout the analyses. Variables were summarized as mean and standard deviation (mean ± SD). Distribution of the data for each variable was evaluated using the Kolmogorov-Smirnov test. Some response variables were log-transformed with base 10 to approximate normality in case of not normally distributed data. The independent samples t-test was used to determine significant differences between the means of the two independent groups. Proportions were compared using the Chi-square test, with p-value < 0.05 considered significant. For bioinformatic data, all statistical analyses and visualizations were carried out in XLSTAT 2019.2.2, PRIMER 7 v7.0.20, and GraphPad Prism 9.0.0. Non-parametric statistical analysis was selected based on the normality of data distribution assessed by the Shapiro-Wilk. All statistical tests maintained a 5% significance level throughout the analyses. The significance of the taxon was calculated using the Kruskal-Wallis test and Dunn's post hoc analysis at the 95% confidence level [28]. Adjustment for multiple comparison analyses was performed by employing the FDR algorithm [29]. The raw 16s amplicon sequences used in this study have been deposited at the NCBI shorts read archive (SRA) with the Bio Project accession number PRJNA877411.

## Results

### Subject demographics

Table 1 shows the characteristics of the study subjects. The 60 subjects had a mean age of  $30 \pm 9.00$  years, with 30 in the overweight group (OWG) and 30 in the normal weight group (NWG). Both study groups had an equal ratio of males and females. Individuals in OWG had significantly higher BMI, WHR, BFM, % BF, SM, SBP, TG, CRP and INS than those in NWG, while HDL-C and BUN levels were lower in NWG compared to OWG ( $p < 0.05$ ).

### Composition and fecal microbiota diversity

As shown in Fig 2A, differences in alpha diversity (Shannon index), richness (Chao1 index) and evenness (Pielou's index) between OWG and NWG were not significant. Furthermore, PCA showed that samples in the two groups were clustered into two different areas (Fig 2B).

Fecal microbiota of all samples were classified into 281 genera, 125 families, 36 classes, 19 phyla and 2 kingdoms. At the phylum level, there were no differences between OWG and NWG in fecal microbiota composition. The four predominant phyla in both groups were *Firmicutes*, *Actinobacteria*, *Bacteroidetes* and *Proteobacteria*. There were no significant differences in the ratio of *Firmicutes/Bacteroidetes* (F/B) between the two groups (Fig 3). At the family level, relative abundances of *Clostridiaceae-1*, *Bacillaceae-1* and *Wohlfahrtiimonas* in OWG were significantly higher than in NWG, while relative abundances of *Eggerthellaceae*, *Rikenellaceae*, *Nocardioideaceae* and *Chitinophagaceae* were significantly lower than in NWG ( $p < 0.05$ ). At the genus level, relative abundances of *Clostridium sensu stricto*, *Senegalimassilia*, *Enterobacter*, *Citrobacter*, *Bacillus*, *Paraclostridium* and *Lancefieldella* were significantly higher in OWG than in NWG, while the relative abundances of *Alistipes*, *Fecalicatena*, *Oscillibacter*, *Limosilactobacillus*, *Slackia*, *Ruthenibacterium*, *Gordonibacter* and *Longibaculum* were significantly higher in NWG than in OWG ( $p < 0.05$ ).

### Dietary intake and eating habits

Nutrient intakes assessed by 3DDR are shown in Table 2. There were no significant differences in daily energy among the two groups; however, mean values of several nutrient intakes



**Table 1. Baseline characteristics of study participants.**

| Characteristic           | Total (n = 60) | NWG (n = 30)   | OWG (n = 30)   | p-value  |
|--------------------------|----------------|----------------|----------------|----------|
| Age (year)               | 30± 9.00       | 27 ± 7.50      | 33 ± 9.48      | 0.008*   |
| Gender (male/female)     | 30/30          | 15/15          | 15/15          | 1.000    |
| Height (cm)              | 167.00 ± 8.36  | 167.20 ± 8.12  | 166.80 ± 8.72  | 0.891    |
| Weight (kg)              | 68.78 ± 13.75  | 58.88 ± 5.76   | 78.68 ± 12.20  | < 0.001* |
| BMI (kg/m <sup>2</sup> ) | 24.68 ± 4.65   | 21.08 ± 1.38   | 28.28 ± 3.92   | < 0.001* |
| SBP (mmHg)               | 119 ± 12       | 114 ± 13       | 124 ± 10       | 0.003*   |
| DBP (mmHg)               | 77 ± 10        | 75 ± 8         | 79 ± 10        | 0.074    |
| BFM (kg)                 | 20.29 ± 9.93   | 13.00 ± 4.96   | 27.57 ± 8.14   | < 0.001* |
| % BF                     | 28.30 ± 10.49  | 21.94 ± 8.41   | 34.66 ± 8.32   | < 0.001* |
| SM (kg)                  | 27.08 ± 5.77   | 25.51 ± 4.55   | 28.64 ± 6.47   | 0.034*   |
| TC (mg/dL)               | 198.67 ± 37.23 | 200.90 ± 32.80 | 196.43 ± 41.64 | 0.646    |
| LDL-C (mg/dL)            | 132.69 ± 37.39 | 131.12 ± 32.06 | 134.26 ± 42.55 | 0.748    |
| HDL-C (mg/dL)            | 52.89 ± 12.59  | 58.63 ± 10.57  | 47.33 ± 12.04  | < 0.001* |
| TC (mg/dL)               | 102.42 ± 65.00 | 82.43 ± 60.98  | 122.40 ± 63.65 | 0.016*   |
| FBG (mg/dL)              | 85.40 ± 7.12   | 85.87 ± 6.11   | 84.93 ± 8.08   | 0.616    |
| CRP (mg/dL)              | 2.18 ± 3.57    | 0.69 ± 0.78    | 3.67 ± 4.55    | < 0.001* |
| BUN(mg/dL)               | 12.55 ± 3.30   | 13.40 ± 3.49   | 11.70 ± 2.91   | 0.045*   |
| CRE (mg/dL)              | 0.81 ± 0.18    | 0.85 ± 0.18    | 0.78 ± 0.18    | 0.126    |
| INS (μU/mL)              | 9.23 ± 5.55    | 6.68 ± 2.42    | 11.77 ± 6.58   | < 0.001* |
| SGOT (U/mL)              | 24.25 ± 23.69  | 0.22 ± 0.04    | 0.22 ± 0.37    | 0.665    |
| SGPT (U/mL)              | 25.05 ± 20.13  | 22.00 ± 17.58  | 28.10 ± 22.27  | 1.000    |

Data are presented as mean ± standard deviation or n (%).

\*p-value for differences between the overweight group (OWG) and normal weight group (NWG) by t-test for continuous variables (p<0.05). Abbreviations: SBP, systolic blood pressure; DBP, diastolic blood pressure; BFM, body fat mass; BF, body fat; SM, skeletal muscle mass; TC, total cholesterol; LDL-C, low density lipoprotein cholesterol; HDL-C, high density lipoprotein cholesterol; TC, triglyceride; FBG, fasting blood glucose; CRP, c-reactive protein; BUN, blood urea nitrogen; CRE, Creatinine; INS, Insulin; SGOT, serum glutamic oxaloacetic transaminase; SGPT, serum glutamate pyruvate transaminase.

<https://doi.org/10.1371/journal.pone.0288286.t001>

showed significant differences between OWG and NWG. Protein-vegetable and iron-vegetable intakes were significantly higher for OWG than NWG. A proportion of the study participants conformed to Thai RDIs for energy and nutrient intakes, as shown in Table 2. The OWG adhered more to energy, carbohydrate, fat and protein recommendations than NWG [30]. Fig 4 compares eating habits between OWG and NWG from FFQ. Individuals in OWG reported greater portion size of food intake and higher consumption of sweet fruits, fast food, food high in fat such as coconut curry, deep-fried food, stir-fried food, food high in carbohydrates such as rice, soup high in salt, processed meat, beverages and alcohol than NWG, while NWG consumed more nuts, grain, vegetables, sweets, snacks, bakeries and spicy food.

### Physical activity and sedentary behavior

The time spent sitting and physical activity level in the study subjects varied significantly between OWG and NWG (p<0.05). OWG spent more time sitting, watching television and lying down with lower physical activity levels than NWG (Fig 5).

### Discussion

Excessive body weight is a well-known risk factor for non-communicable diseases (NCDs) [31]. In this study, we investigated the differences in metabolic profiles, gut microbiota and

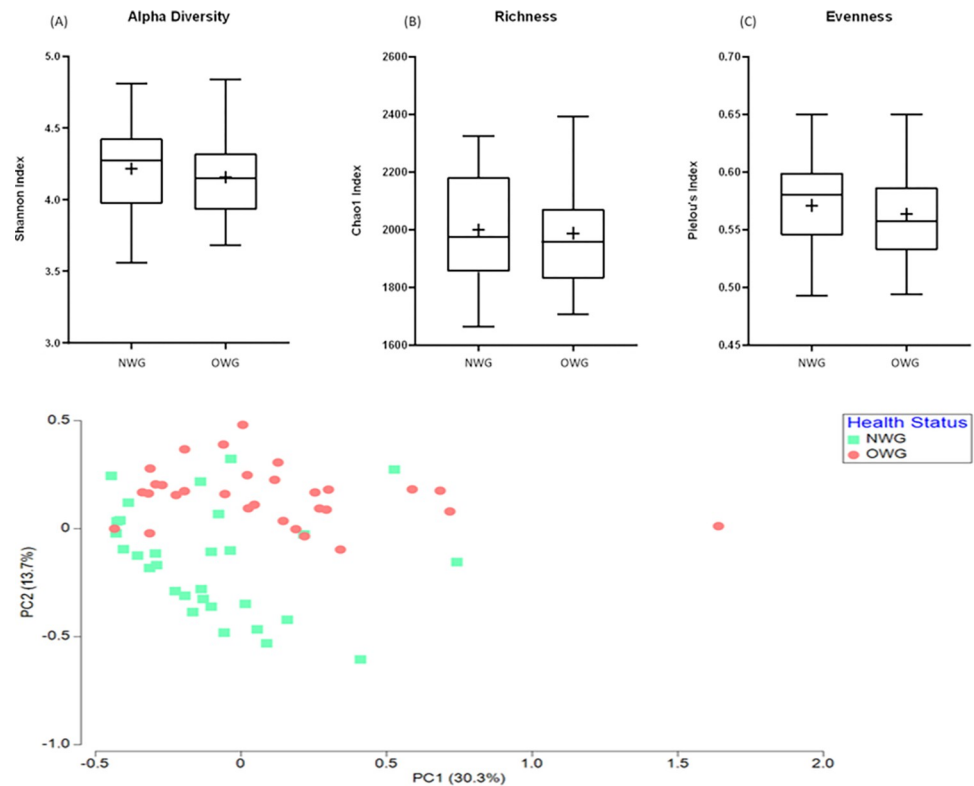

**Fig 2. Diversity of fecal microbiota in OWG and NWG.** (A) Alpha diversity index between groups. (B) Beta-diversity visualized by PCA analysis. Each point represents one sample and points with the same color are in one group.

<https://doi.org/10.1371/journal.pone.0288286.g002>

lifestyle factors in overweight (OWG) and normal weight (NWG) young Thai adults. These comparisons offer a clear picture of the reasons for overweight young adults in developing countries. In our clinical setting, we grouped the subjects by BMI and waist circumference (WC) following Asia criteria to screen for abdominal obesity because BMI alone does not account for body fat distribution [32]. We found that the mean age of OWG was higher than NWG ( $p \leq 0.05$ ); however, all subjects in both groups were healthy young adults. Evidence shows that Thai people increase their BMI when age increases [33]. The main finding of this study was the statistically significant difference in some metabolic and inflammatory profiles and fecal microbiota composition at the genus and family levels, as well as dietary habits, physical activity and sedentary behavior in OWG compared with NWG. Results showed significantly high levels of TAG, INS, CRP and SBP, with low levels of HDL-C and BUN in OWG, concurring with previous studies [3, 26, 34, 35]. Average clinical blood values were in the normal reference range in OWG because the samples were free from chronic diseases. Obesity is associated with abnormal lipid metabolism and a higher risk of NCDs in adults [36]. Elevated levels of TAG and SBP and low levels of HDL-C are high risk factors for coronary heart disease [37]. Overweight individuals (BMI 25–29.9 kg/m<sup>2</sup>) had a 60% higher risk of CVD mortality [38]. Each 1-mg/dL elevation in HDL-C reduced CVD risk by 2% to 3% [39]. For SBP, each 5 mm Hg increment resulted in a 4% higher risk of cardiovascular events [40]. High FI level is associated with high rates of weight gain [41] as an accurate predictor of insulin resistance (IR) [42], which is a fundamental aspect of the etiology of type 2 diabetes [43]. In a large cohort of 10,745 subjects, low-grade systemic inflammation and CRP increased as BMI increased [44].



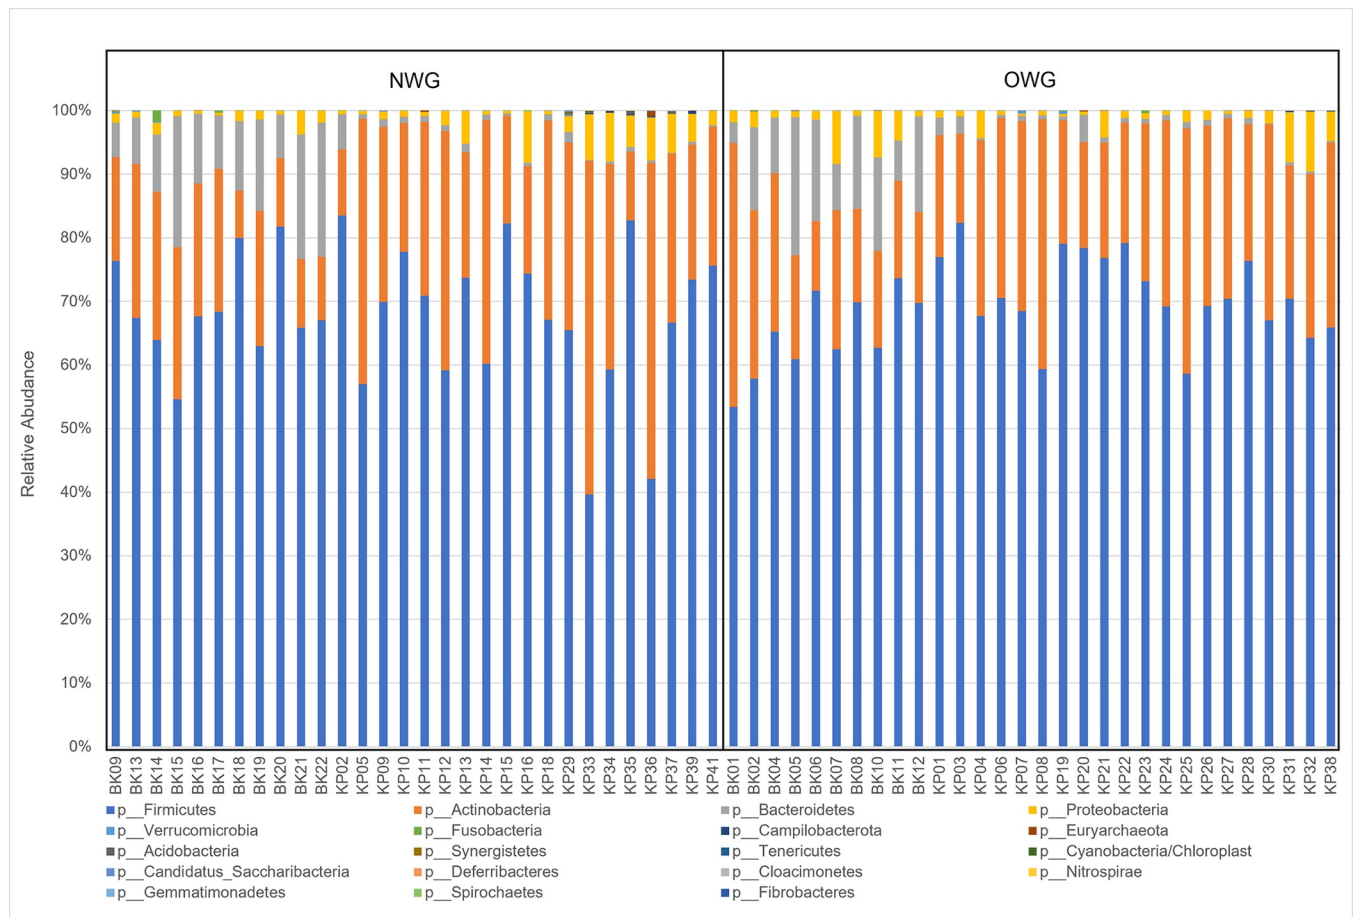

**Fig 3. Fecal microbiota composition in OWG and NWG.** Bar plot of fecal microbiota composition at the phylum level.

<https://doi.org/10.1371/journal.pone.0288286.g003>

Levels of CRP at more than 1.0 mg/dL have been associated with a 2- to 3-fold increase in risk of NCDs in healthy men and women [45]. Our results indicated that individuals in OWG had average CRP concentration of  $3.67 \pm 4.55$  mg/dL with increased risk of NCDs.

Lifestyles, such as dietary habits and physical activity, play an important role in obesity development [46]. Nutrition transition in developing countries leads to dietary intakes of micronutrient-poor, energy-dense foods as important determinants of overweight/obesity [47]. In our study, only a few dietary factors were significantly different between OWG and NWG. The absolute amount of dietary fat and protein intake from 3DDR was higher in OWG and exceeded the current Thai recommendation. Many dietary habits contribute to obesity including eating frequency, meat consumption and calories from protein and snack consumption [36]. We observed more unhealthy eating habits such as large portion size per meal, high consumption of sweet fruits, food rich in fat and carbohydrates, processed meat, beverages and alcohol and consuming fewer vegetables, nuts, grain and spices in the OWG. These increased clinical biomarkers contributed to NCDs in overweight young adults.

We found that fiber intake was higher in the OWG compared to NWG. The OWG had careers in agriculture and farming with low incomes, preferring to find plants, vegetables and insects that are available from natural sources for consumption, resulting in fiber and plant-based protein and more animals than the NWG, who mostly worked in offices. Office workers in Thailand often consume high-fat meat that is grilled or deep fried and may result in the

Table 2. Energy and nutrient intake of subjects assessed with 3DDR.

| Nutrition                      | NWG (n = 30)      | %RDI   | OWG (n = 30)        | %RDI    | p-value |
|--------------------------------|-------------------|--------|---------------------|---------|---------|
| Energy (kcal)                  | 1,349.50 ± 405.90 | 66.8%  | 1,425.21 ± 633.49   | 71.8%   | 0.584   |
| Carbohydrate (g)               | 149.99 ± 48.01    | 37.6%  | 172.21 ± 69.32      | 44.0%   | 0.154   |
| FAT (g)                        | 54.54 ± 23.33     | 109.1% | 51.51 ± 32.51       | 103.0%  | 0.680   |
| Protein (g)                    | 64.66 ± 26.69     | 114.4% | 68.19 ± 40.84       | 121.8%  | 0.693   |
| Protein-animal (g)             | 47.29 ± 25.91     | NA     | 48.18 ± 36.67       | NA      | 0.914   |
| Protein-vegetable (g)          | 8.51 ± 3.55       | NA     | 12.06 ± 6.13        | NA      | 0.008*  |
| Calcium (mg)                   | 321.57 ± 158.81   | 40.2%  | 345.89 ± 260.99     | 43.2%   | 0.664   |
| Iron (mg)                      | 8.10 ± 3.82       | 51.4%  | 8.84 ± 4.18         | 56.1%   | 0.476   |
| Iron-animal (mg)               | 4.11 ± 2.33       | NA     | 3.97 ± 3.43         | NA      | 0.851   |
| Iron-vegetable (mg)            | 2.69 ± 1.38       | NA     | 3.43 ± 1.31         | NA      | 0.037*  |
| Vitamin A (RAE)                | 567.63 ± 987.58   | 81.1%  | 501.83 ± 982.21     | 71.7%   | 0.797   |
| Thiamin (mg)                   | 0.82 ± 0.50       | 71.3%  | 1.73 ± 3.47         | 150.4%  | 0.158   |
| Riboflavin (mg)                | 0.90 ± 0.35       | 75.0%  | 0.95 ± 0.52         | 79.2%   | 0.712   |
| Vitamin C (mg)                 | 49.16 ± 94.98     | 53.1%  | 59.94 ± 84.61       | 64.8%   | 0.644   |
| Niacin (mg)                    | 9.00 ± 5.39       | 60.0%  | 11.08 ± 5.23        | 73.9%   | 0.134   |
| Ash (mg)                       | 34.83 ± 19.85     | NA     | 54.01 ± 70.47       | NA      | 0.157   |
| Beta-carotene (mcg)            | 1727.41 ± 2076.85 | NA     | 1643.24 ± 1576.28   | NA      | 0.861   |
| Copper (mg)                    | 1.42 ± 1.10       | 97.9%  | 1.93 ± 1.16         | 133.1%  | 0.086   |
| Crude fiber (g)                | 0.55 ± 0.75       | NA     | 0.80 ± 1.54         | NA      | 0.491   |
| Dietary fiber (g)              | 18.55 ± 10.64     | 74.2%  | 23.42 ± 12.72       | 93.7%   | 0.113   |
| Cholesterol (mg)               | 1030.29 ± 550.57  | NA     | 863.74 ± 539.76     | NA      | 0.242   |
| Potassium (mg)                 | 3201.82 ± 1823.37 | 84.3%  | 3423.17 ± 1669.07   | 91.3%   | 0.626   |
| Magnesium (mg)                 | 128.58 ± 115.13   | 45.1%  | 138.19 ± 84.82      | 47.7%   | 0.714   |
| Sodium (mg)                    | 6959.63 ± 4562.20 | 520.1% | 10484.51 ± 16177.80 | 791.3%  | 0.255   |
| Phosphorus (mg)                | 1703.54 ± 743.72  | 243.4% | 1794.49 ± 835.74    | 256.4%  | 0.658   |
| Phytate (mg)                   | 40.24 ± 60.73     | NA     | 24.74 ± 38.65       | NA      | 0.251   |
| Retinol (mcg)                  | 1292.12 ± 2620.02 | NA     | 1334.39 ± 2959.72   | NA      | 0.953   |
| Total saturated fatty acid (g) | 43.72 ± 26.14     | 198.7% | 44.02 ± 28.34       | 200.1%  | 0.966   |
| Selenium (mcg)                 | 102.44 ± 54.40    | 186.3% | 100.92 ± 54.60      | 183.5%  | 0.915   |
| Sugar (g)                      | 124.49 ± 73.78    | NA     | 143.65 ± 103.72     | NA      | 0.413   |
| Vitamin B12 (mcg)              | 4.31 ± 4.11       | 179.6% | 2.87 ± 2.80         | 119.6%  | 0.127   |
| Vitamin B6 (mg)                | 12.1 ± 0.71       | 930.8% | 1.14 ± 0.71         | 87.7%   | 0.712   |
| Vitamin E (mg)                 | 70.65 ± 293.45    | 588.8% | 156.28 ± 501.32     | 1302.3% | 0.423   |
| Water (g)                      | 2467.68 ± 1763.80 | NA     | 2976.60 ± 1746.13   | NA      | 0.266   |
| Zinc (mg)                      | 11.10 ± 6.17      | 106.7% | 13.51 ± 5.85        | 134.4%  | 0.125   |

Data are presented as mean ± standard deviation.

\*p-value for difference between the overweight group (OWG) and the normal weight group (NWG) ( $p < 0.05$ ). Abbreviations: RDI, recommended dietary intake; NA, not applicable.

<https://doi.org/10.1371/journal.pone.0288286.t002>

intake of fat and cholesterol from food. The NWG consumed snacks and bakery products that contained more fat and/or cholesterol than the OWG. Data on the amount of vitamin E that Thai people have is limited. This study showed that both the NWG group and the OWG group received sufficient vitamin E from diet. Most Thai dishes are cooked by stir-frying or deep fried, while coconut milk curry contains oil. The most popular cooking oils are rice bran oil, soybean oil and palm oil which is a source of vitamin E. However, vitamin E intakes in both groups were within the range set by the European Food Safety Authority (EFSA) [48]. The

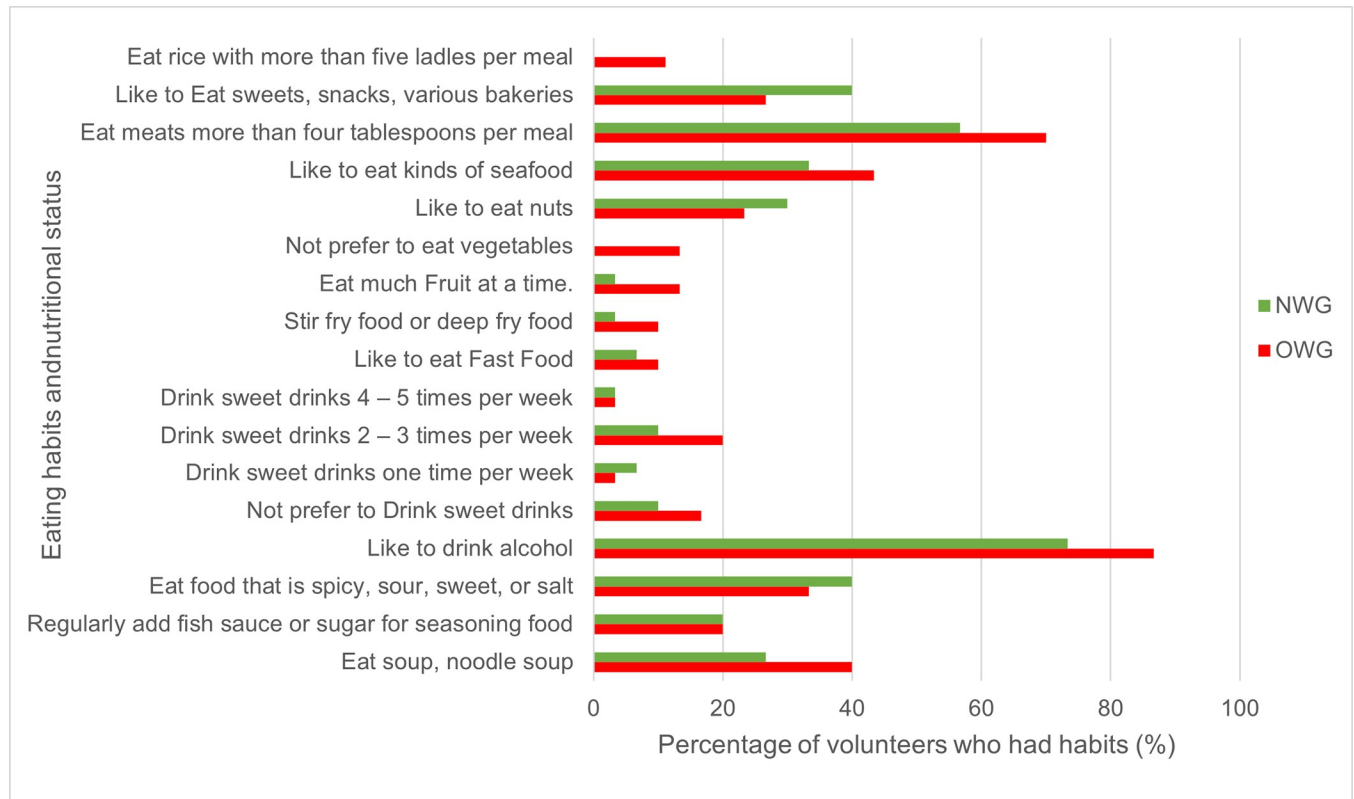

**Fig 4. Comparison of eating habits and nutritional status of subjects.**

<https://doi.org/10.1371/journal.pone.0288286.g004>

study also has some limitations. 3DDR has a relatively high respondent burden that may affect foods or quantities that are selected. Subjects also tend to record less diligently as the duration increases, while FFQ relies on the ability of long-term recall [49]. Furthermore, our study was conducted during the COVID-19 pandemic and this may have affected eating behaviors [50].

Physical activity plays a fundamental role in balancing energy and weight, NCD risk factors and promoting general well-being. According to the WHO recommendations, an adult needs to undertake moderate-intensity physical activity for at least 150 minutes throughout the week [51]. We found that individuals with normal BMI adhered to WHO physical activity recommendations. Elevated BMI is considerably reduced by higher physical activity levels. The Rotterdam Study also mentioned that overweight participants with low levels of physical activity had a 1.33 and 1.35 times higher risk of CVD than the normal weight participants with high levels of physical activity [52]. Lifestyle modifications involving specific changes in diet, physical activity and exercise are considered cornerstones of obesity management.

Several studies have shown direct associations between sedentary behavior (SB) such as sleeping, sitting, lying down and watching television and increased risk of NCDs [53, 54]. In line with these, we also found that OWG spent more time each day sitting and watching TV than NWG and less time doing exercise. Experimental studies in humans have demonstrated that an increase in SB is associated with reduced energy expenditure, development of IR and accumulation of abdominal fat [55]. The association between SB and adiposity was partially explained by food and beverage consumption during TV viewing but not by a reduction in overall leisure-time physical activity [56]. Our results suggested that overweight individuals spend more time sitting and are physically less active because of their body weight. Current

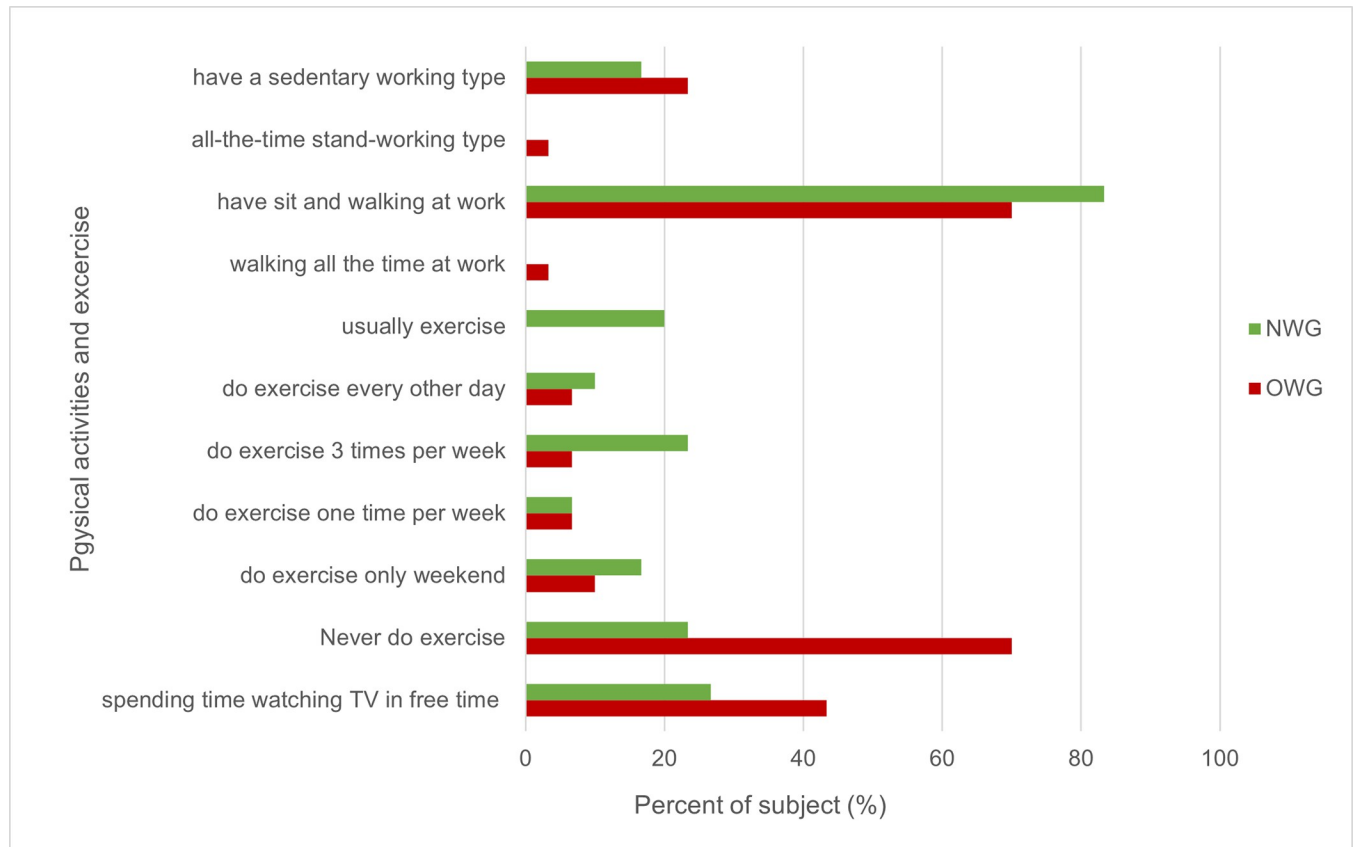

**Fig 5. Comparison of physical activity and sedentary behavior between NWG and OWG.**

<https://doi.org/10.1371/journal.pone.0288286.g005>

key recommendations encourage people to increase their physical activity levels by adopting a healthy diet corresponding to energy expenditure, while also reducing time spent sitting down and watching TV, to prevent accumulation of excess body weight [57].

The gut microbiota has recently been recognized as a key environmental factor driving metabolic diseases [58, 59]. Dysbiosis in intestinal microbiota has been associated with obesity [60, 61]. Previous studies showed that the structure, function and diversity of the gut microbiota among people with obesity are different from those with normal weight [62, 63]. Our study found no significant difference in fecal microbiota diversity and composition at the phylum level, similar to Gruneck et al. [17]. Research indicated that the amount and structure of gut microflora are 57% influenced by dietary habits and 12% by genetic factors [64]. In our study, no significant differences in daily energy were found among the two groups, contributing to the similarity of fecal microbiota diversity and composition at the phylum level in both groups. The four predominant phyla in both groups were *Firmicutes*, *Actinobacteria*, *Bacteroidetes* and *Proteobacteria*, concurring with previous studies that reported these phyla as contributing the majority of human gut bacteria [65]. Foods that strongly affect gut microflora include resistant starch, fats, fructose, glucose, casein and arginine [66]. Consuming starchy foods such as rice, noodles and white flour resulted in a large proportion of *Firmicutes* and *Actinobacteria* [67, 68]. However, at the genus and family level, significant differences in bacterial compositions were observed between NWG and OWG ( $p < 0.05$ ). Relative abundances of *Alistipes*, *Fecalibacterium*, *Oscillibacter*, *Limosilactobacillus*, *Slackia*, *Ruthenibacterium*, *Gordonibacter* and *Longibaculum* were significantly higher in NWG than in OWG. *Oscillibacter* has also been suggested

to promote human leanness and was enriched in healthy-weight subjects [69]. *Citrobacter*, a common urinary pathogen, was higher in NWG and related to the higher value of BUN in our subjects [70, 71] but opposite findings have also been reported [72, 73]. Gut microbiota reduce the development of obesity by regulating energy and improving the ability to ferment and digest polysaccharide foods which produce short chain fatty acids that stimulate lipogenesis, causing the accumulation of triglyceride fat in fat cells [74]. Research has shown that succinate, produced from microorganisms in the phylum *Bacteroidetes* (Prevotella), can stimulate gluconeogenesis, resulting in fat accumulation and increased body weight [75]. Furthermore, changes in intestinal microbiota suggest that physical activity could increase microbial variance, thereby neutralizing obesity progression and diminishing body weight [76].

## Conclusions

Findings from this cohort study showed that being overweight disturbs the lipid and glucose metabolisms in otherwise healthy Thai young adults. Unhealthy lifestyles, including lack of sufficient physical activity and unhealthy dietary habits, might contribute to the development of overweight. Our results offer supportive evidence for public health policies and healthcare professionals to encourage people to modify their lifestyles to reduce the risk of being overweight. However, further studies are needed with larger sample sizes to identify the correlation between fecal microbiota-derived metabolites and health status in overweight young adults.

## Supporting information

**S1 Checklist. CONSORT checklist.**  
(PDF)

**S1 File. Trial protocol.**  
(DOCX)

**S2 File. Food Frequency Questionnaire (FFQ).**  
(DOCX)

**S3 File.**  
(DOCX)

## Acknowledgments

The authors would like to thank Kasetsart University Research and Development Institute (KURDI), Thailand for all the support, Mr. Kevin Mok for fecal microbiota analysis and all volunteers for participating in this study.

## Author Contributions

**Conceptualization:** Bandhita Wanikorn.

**Data curation:** Surasawadee Somnuk, Sudjai Monkhai, Thitirat Poolsawat, Bandhita Wanikorn.

**Formal analysis:** Surasawadee Somnuk, Thitirat Poolsawat, Bandhita Wanikorn.

**Funding acquisition:** Bandhita Wanikorn.

**Investigation:** Surasawadee Somnuk, Thitirat Poolsawat, Bandhita Wanikorn.

**Methodology:** Massalin Nakphaichit, Bandhita Wanikorn.

**Project administration:** Bandhita Wanikorn.

**Resources:** Surasawadee Somnuk, Surat Komindr, Sudjai Monkhai, Thitirat Poolsawat, Massalin Nakphaichit, Bandhita Wanikorn.

**Software:** Bandhita Wanikorn.

**Supervision:** Bandhita Wanikorn.

**Validation:** Surasawadee Somnuk, Bandhita Wanikorn.

**Visualization:** Bandhita Wanikorn.

**Writing – original draft:** Bandhita Wanikorn.

## References

1. Zatońska K., et al., Obesity and Chosen Non-Communicable Diseases in PURE Poland Cohort Study. *Int J Environ Res Public Health*, 2021. 18(5). <https://doi.org/10.3390/ijerph18052701> PMID: 33800151
2. PUTSON P., WANIKORN, Bandhita and SAE-TAN, Sudathip, Effects of age and food processing of sapodilla leaves for botanical beverage application. *Food Science and Technology*, 2022. 42.
3. Safaei M., et al., A systematic literature review on obesity: Understanding the causes & consequences of obesity and reviewing various machine learning approaches used to predict obesity. *Computers in Biology and Medicine*, 2021. 136: p. 104754.
4. Prentice A.M., The emerging epidemic of obesity in developing countries. *International Journal of Epidemiology*, 2005. 35(1): p. 93–99. <https://doi.org/10.1093/ije/dyi272> PMID: 16326822
5. Poobalan A. and Aucott L., Obesity Among Young Adults in Developing Countries: A Systematic Overview. *Curr Obes Rep*, 2016. 5(1): p. 2–13. <https://doi.org/10.1007/s13679-016-0187-x> PMID: 26883372
6. Hall K.D. and Kahan S., Maintenance of Lost Weight and Long-Term Management of Obesity. *Med Clin North Am*, 2018. 102(1): p. 183–197. <https://doi.org/10.1016/j.mcna.2017.08.012> PMID: 29156185
7. Kerkadi A., et al., The Relationship between Lifestyle Factors and Obesity Indices among Adolescents in Qatar. *Int J Environ Res Public Health*, 2019. 16(22). <https://doi.org/10.3390/ijerph16224428> PMID: 31766192
8. Roman G., et al., DIETARY PATTERNS AND THEIR ASSOCIATION WITH OBESITY: A CROSS-SECTIONAL STUDY. *Acta Endocrinol (Buchar)*, 2019. - 5(1): p. 86–95. <https://doi.org/10.4183/aeb.2019.86> PMID: 31149065
9. Cunningham A.L., Stephens J.W., and Harris D.A., A review on gut microbiota: a central factor in the pathophysiology of obesity. *Lipids in Health and Disease*, 2021. 20(1): p. 65. <https://doi.org/10.1186/s12944-021-01491-z> PMID: 34233682
10. Jia L., et al., Association between diet quality and obesity indicators among the working-age adults in Inner Mongolia, Northern China: a cross-sectional study. *BMC Public Health*, 2020. 20(1): p. 1165. <https://doi.org/10.1186/s12889-020-09281-5> PMID: 32711506
11. Pietiläinen K.H., et al., Physical inactivity and obesity: a vicious circle. *Obesity (Silver Spring)*, 2008. 16(2): p. 409–14. <https://doi.org/10.1038/oby.2007.72> PMID: 18239652
12. Mitchell C.M., et al., Does Exercise Alter Gut Microbial Composition? A Systematic Review. *Med Sci Sports Exerc*, 2019. 51(1): p. 160–167. <https://doi.org/10.1249/MSS.0000000000001760> PMID: 30157109
13. Saibandith B., et al., Olive Polyphenols and the Metabolic Syndrome. *Molecules*, 2017. 22(7). <https://doi.org/10.3390/molecules22071082> PMID: 28661446
14. Geng J., et al., The links between gut microbiota and obesity and obesity related diseases. *Biomedicine & Pharmacotherapy*, 2022. 147: p. 112678. <https://doi.org/10.1016/j.biopha.2022.112678> PMID: 35134709
15. Vela J., et al., Impact of Exercise on Gut Microbiota in Obesity. *Nutrients*, 2021. 13: p. 3999. <https://doi.org/10.3390/nu13113999> PMID: 34836254
16. Riaz Rajoka M.S., et al., Interaction between diet composition and gut microbiota and its impact on gastrointestinal tract health. *Food Science and Human Wellness*, 2017. 6(3): p. 121–130.
17. Grunec L., et al., Gut microbiota of obese and diabetic Thai subjects and interplay with dietary habits and blood profiles. *PeerJ*, 2020. 8: p. e9622–e9622. <https://doi.org/10.7717/peerj.9622> PMID: 32832269



18. Jinatham V., et al., Comparison of Gut Microbiota between Lean and Obese Adult Thai Individuals. 2018. 46: p. 277–287.
19. Raethong N., et al., Analysis of human gut microbiome: Taxonomy and metabolic functions in thai adults. *Genes*, 2021. 12(3): p. 1–13. <https://doi.org/10.3390/genes12030331> PMID: 33668840
20. Keshteli A., et al., A Dish-based Semi-quantitative Food Frequency Questionnaire for Assessment of Dietary Intakes in Epidemiologic Studies in Iran: Design and Development. *Int J Prev Med*, 2014. 5(1): p. 29–36.
21. Hagströmer M., Oja P., and Sjöström M., The International Physical Activity Questionnaire (IPAQ): a study of concurrent and construct validity. *Public Health Nutr*, 2006. 9(6): p. 755–62. <https://doi.org/10.1079/phn2005898> PMID: 16925881
22. Edgar R.C., Search and clustering orders of magnitude faster than BLAST. *Bioinformatics*, 2010. 26(19): p. 2460–2461. <https://doi.org/10.1093/bioinformatics/btq461> PMID: 20709691
23. Edgar R.C. and Flyvbjerg H., Error filtering, pair assembly and error correction for next-generation sequencing reads. *Bioinformatics*, 2015. 31(21): p. 3476–82. <https://doi.org/10.1093/bioinformatics/btv401> PMID: 26139637
24. Edgar R.C., SINTAX: a simple non-Bayesian taxonomy classifier for 16S and ITS sequences. *bioRxiv*, 2016: p. 074161.
25. Cole J.R., et al., Ribosomal Database Project: data and tools for high throughput rRNA analysis. *Nucleic Acids Research*, 2013. 42(D1): p. D633–D642. <https://doi.org/10.1093/nar/gkt1244> PMID: 24288368
26. Bora K., et al., Association of Decreased High-Density Lipoprotein Cholesterol (HDL-C) With Obesity and Risk Estimates for Decreased HDL-C Attributable to Obesity: Preliminary Findings From a Hospital-Based Study in a City From Northeast India. *J Prim Care Community Health*, 2017. 8(1): p. 26–30. <https://doi.org/10.1177/2150131916664706> PMID: 27531078
27. Gordon D.J., et al., High-density lipoprotein cholesterol and cardiovascular disease. Four prospective American studies. *Circulation*, 1989. 79(1): p. 8–15. <https://doi.org/10.1161/01.cir.79.1.8> PMID: 2642759
28. Dunn O.J., Multiple Comparisons among Means. *Journal of the American Statistical Association*, 1961. 56(293): p. 52–64.
29. Benjamini Y. and Hochberg Y., Controlling the False Discovery Rate: A Practical and Powerful Approach to Multiple Testing. *Journal of the Royal Statistical Society: Series B (Methodological)*, 1995. 57(1): p. 289–300.
30. Ivanovitch K., et al., The Intake of Energy and Selected Nutrients by Thai Urban Sedentary Workers: An Evaluation of Adherence to Dietary Recommendations. *Journal of Nutrition and Metabolism*, 2014. 2014: p. 145182. <https://doi.org/10.1155/2014/145182> PMID: 25525512
31. Kopelman P., Health risks associated with overweight and obesity. *Obes Rev*, 2007. 8 Suppl 1: p. 13–7. <https://doi.org/10.1111/j.1467-789X.2007.00311.x> PMID: 17316295
32. Cong X., et al., Combined consideration of body mass index and waist circumference identifies obesity patterns associated with risk of stroke in a Chinese prospective cohort study. *BMC Public Health*, 2022. 22(1): p. 347. <https://doi.org/10.1186/s12889-022-12756-2> PMID: 35180873
33. Jitnarin N., et al., Prevalence of overweight and obesity in Thai population: results of the National Thai Food Consumption Survey. *Eat Weight Disord*, 2011. 16(4): p. e242–9. <https://doi.org/10.1007/BF03327467> PMID: 22526130
34. Rogero Blanco M.E., et al., Prevalence of insulin resistance in a young adult population. Relationship with weight status. *Endocrinología y Nutrición (English Edition)*, 2012. 59(2): p. 98–104.
35. Kahn B.B. and Flier J.S., Obesity and insulin resistance. *J Clin Invest*, 2000. 106(4): p. 473–81. <https://doi.org/10.1172/JCI10842> PMID: 10953022
36. Jeon K.J., et al., Comparison of the dietary intake and clinical characteristics of obese and normal weight adults. *Nutr Res Pract*, 2011. 5(4): p. 329–36. <https://doi.org/10.4162/nrp.2011.5.4.329> PMID: 21994528
37. Szczygielska A., et al., Blood lipids profile in obese or overweight patients. *Ann Univ Mariae Curie Skłodowska Med*, 2003. 58(2): p. 343–9. PMID: 15323217
38. Katzmarzyk P.T., et al., Body mass index and risk of cardiovascular disease, cancer and all-cause mortality. *Can J Public Health*, 2012. 103(2): p. 147–51. <https://doi.org/10.1007/BF03404221> PMID: 22530540
39. Toth P.P., High-density lipoprotein as a therapeutic target: clinical evidence and treatment strategies. *Am J Cardiol*, 2005. 96(9a): p. 50K–58K; discussion 34K–35K. <https://doi.org/10.1016/j.amjcard.2005.08.008> PMID: 16291015

40. Luo D., et al., Association between high blood pressure and long term cardiovascular events in young adults: systematic review and meta-analysis. *BMJ*, 2020. 370: p. m3222. <https://doi.org/10.1136/bmj.m3222> PMID: 32907799
41. Kolb H., et al., Insulin translates unfavourable lifestyle into obesity. *BMC Medicine*, 2018. 16(1): p. 232. <https://doi.org/10.1186/s12916-018-1225-1> PMID: 30541568
42. Panag K.M., Kaur N., and Goyal G., Correlation of insulin resistance by various methods with fasting insulin in obese. *Int J Appl Basic Med Res*, 2014. 4(Suppl 1): p. S41–5. <https://doi.org/10.4103/2229-516X.140733> PMID: 25298942
43. Reaven G.M., Pathophysiology of insulin resistance in human disease. *Physiol Rev*, 1995. 75(3): p. 473–86. <https://doi.org/10.1152/physrev.1995.75.3.473> PMID: 7624391
44. Aronson D., et al., Obesity is the major determinant of elevated C-reactive protein in subjects with the metabolic syndrome. *Int J Obes Relat Metab Disord*, 2004. 28(5): p. 674–9. <https://doi.org/10.1038/sj.ijo.0802609> PMID: 14993913
45. Ellulu M.S., et al., Obesity and inflammation: the linking mechanism and the complications. *Arch Med Sci*, 2017. 13(4): p. 851–863. <https://doi.org/10.5114/aoms.2016.58928> PMID: 28721154
46. Shields M. and Tremblay M.S., Sedentary behaviour and obesity. *Health Rep*, 2008. 19(2): p. 19–30. PMID: 18642516
47. Troesch B., et al., Increased Intake of Foods with High Nutrient Density Can Help to Break the Intergenerational Cycle of Malnutrition and Obesity. *Nutrients*, 2015. 7(7): p. 6016–37. <https://doi.org/10.3390/nu7075266> PMID: 26197337
48. EFSA EFSA Panel on Dietetic Products, Nutrition and Allergies. Scientific opinion on Dietary Reference Values for vitamin E as -tocopherol. *EFSA Journal*, 2015. 13: p. 72.
49. Ralph J.L., et al., Diet assessment methods: a guide for oncology nurses. *Clin J Oncol Nurs*, 2011. 15(6): p. E114–21. <https://doi.org/10.1188/11.CJON.E114-E121> PMID: 22119986
50. González-Monroy C., et al., Eating Behaviour Changes during the COVID-19 Pandemic: A Systematic Review of Longitudinal Studies. *Int J Environ Res Public Health*, 2021. 18(21). <https://doi.org/10.3390/ijerph182111130> PMID: 34769648
51. Saqib Z.A., et al., Physical Activity is a Medicine for Non-Communicable Diseases: A Survey Study Regarding the Perception of Physical Activity Impact on Health Wellbeing. *Risk Manag Healthc Policy*, 2020. 13: p. 2949–2962. <https://doi.org/10.2147/RMHP.S280339> PMID: 33335436
52. Koolhaas C.M., et al., Impact of physical activity on the association of overweight and obesity with cardiovascular disease: The Rotterdam Study. *European Journal of Preventive Cardiology*, 2017. 24(9): p. 934–941.
53. Hu F.B., et al., Physical activity and television watching in relation to risk for type 2 diabetes mellitus in men. *Arch Intern Med*, 2001. 161(12): p. 1542–8. <https://doi.org/10.1001/archinte.161.12.1542> PMID: 11427103
54. Hu F.B., et al., Television watching and other sedentary behaviors in relation to risk of obesity and type 2 diabetes mellitus in women. *Jama*, 2003. 289(14): p. 1785–91. <https://doi.org/10.1001/jama.289.14.1785> PMID: 12684356
55. Olsen R.H., et al., Metabolic responses to reduced daily steps in healthy nonexercising men. *Jama*, 2008. 299(11): p. 1261–3. <https://doi.org/10.1001/jama.299.11.1259> PMID: 18349087
56. Cleland V.J., et al., Television viewing and abdominal obesity in young adults: is the association mediated by food and beverage consumption during viewing time or reduced leisure-time physical activity? *Am J Clin Nutr*, 2008. 87(5): p. 1148–55. <https://doi.org/10.1093/ajcn/87.5.1148> PMID: 18469233
57. Chan R.S. and Woo J., Prevention of overweight and obesity: how effective is the current public health approach. *Int J Environ Res Public Health*, 2010. 7(3): p. 765–83. <https://doi.org/10.3390/ijerph7030765> PMID: 20617002
58. Boulangé C.L., et al., Impact of the gut microbiota on inflammation, obesity, and metabolic disease. *Genome Medicine*, 2016. 8(1): p. 42. <https://doi.org/10.1186/s13073-016-0303-2> PMID: 27098727
59. Kingkaw A., et al., Analysis of the infant gut microbiome reveals metabolic functional roles associated with healthy infants and infants with atopic dermatitis using metaproteomics. *PeerJ*, 2020. 8. <https://doi.org/10.7717/peerj.9988> PMID: 33033661
60. Ley R.E., et al., Human gut microbes associated with obesity. *Nature*, 2006. 444(7122): p. 1022–1023.
61. Jatuponwiphat T., et al., Comparative genome analysis reveals metabolic traits associated with probiotics properties in *Lactobacillus reuteri* KUB-AC5. *Gene Reports*, 2019. 17.
62. Cheng L., et al., A metagenomic analysis of the modulatory effect of *Cyclocarya paliurus* flavonoids on the intestinal microbiome in a high-fat diet-induced obesity mouse model. *J Sci Food Agric*, 2019. 99(8): p. 3967–3975. <https://doi.org/10.1002/jsfa.9622> PMID: 30719705

63. Moreira A.B., Teixeira T.F.S., and Alfenas R.d.C.G, Gut microbiota and the development of obesity. *Nutrición Hospitalaria*, 2012. 27(5): p. 1408–1414. <https://doi.org/10.3305/nh.2012.27.5.5887> PMID: [23478685](https://pubmed.ncbi.nlm.nih.gov/23478685/)
64. Tomasello G., et al., Dismicrobism in inflammatory bowel disease and colorectal cancer: changes in response of colocytes. *World J Gastroenterol*, 2014. 20(48): p. 18121–30. <https://doi.org/10.3748/wjg.v20.i48.18121> PMID: [25561781](https://pubmed.ncbi.nlm.nih.gov/25561781/)
65. Jain A., Li X.H., and Chen W.N., Similarities and differences in gut microbiome composition correlate with dietary patterns of Indian and Chinese adults. *AMB Express*, 2018. 8(1): p. 104. <https://doi.org/10.1186/s13568-018-0632-1> PMID: [29936607](https://pubmed.ncbi.nlm.nih.gov/29936607/)
66. La-ongkham O., et al., Distinct gut microbiota of healthy children from two different geographic regions of Thailand. *Archives of Microbiology*, 2015. 197(4): p. 561–573. <https://doi.org/10.1007/s00203-015-1089-0> PMID: [25644242](https://pubmed.ncbi.nlm.nih.gov/25644242/)
67. Seo Y.S., et al., Dietary Carbohydrate Constituents Related to Gut Dysbiosis and Health. *Microorganisms*, 2020. 8(3). <https://doi.org/10.3390/microorganisms8030427> PMID: [32197401](https://pubmed.ncbi.nlm.nih.gov/32197401/)
68. Sathitkowitzai W., et al., A randomized trial to evaluate the impact of copra meal hydrolysate on gastrointestinal symptoms and gut microbiome. *PeerJ*, 2021. 9. <https://doi.org/10.7717/peerj.12158> PMID: [34616618](https://pubmed.ncbi.nlm.nih.gov/34616618/)
69. Abdullah B., et al., Gut microbiota in pregnant Malaysian women: a comparison between trimesters, body mass index and gestational diabetes status. *BMC Pregnancy and Childbirth*, 2022. 22(1): p. 152. <https://doi.org/10.1186/s12884-022-04472-x> PMID: [35209853](https://pubmed.ncbi.nlm.nih.gov/35209853/)
70. Ranjan K.P. and Ranjan N., Citrobacter: An emerging health care associated urinary pathogen. *Urol Ann*, 2013. 5(4): p. 313–4. PMID: [24311922](https://pubmed.ncbi.nlm.nih.gov/24311922/)
71. Shin S. and Cho K.Y., Altered Gut Microbiota and Shift in Bacteroidetes between Young Obese and Normal-Weight Korean Children: A Cross-Sectional Observational Study. *Biomed Res Int*, 2020. 2020: p. 6587136. <https://doi.org/10.1155/2020/6587136> PMID: [32908903](https://pubmed.ncbi.nlm.nih.gov/32908903/)
72. Mei H., et al., Gut Microbiota Diversity and Overweight/Obesity in Infancy: Results from a Nested Case-control Study. *Current Medical Science*, 2022. 42(1): p. 210–216. <https://doi.org/10.1007/s11596-021-2476-1> PMID: [34985609](https://pubmed.ncbi.nlm.nih.gov/34985609/)
73. Fei N. and Zhao L., An opportunistic pathogen isolated from the gut of an obese human causes obesity in germfree mice. *The ISME Journal*, 2013. 7(4): p. 880–884. <https://doi.org/10.1038/ismej.2012.153> PMID: [23235292](https://pubmed.ncbi.nlm.nih.gov/23235292/)
74. Chen Y., Zhou J., and Wang L., Role and Mechanism of Gut Microbiota in Human Disease. *Frontiers in Cellular and Infection Microbiology*, 2021. 11. <https://doi.org/10.3389/fcimb.2021.625913> PMID: [33816335](https://pubmed.ncbi.nlm.nih.gov/33816335/)
75. De Vadder F., et al., Microbiota-Produced Succinate Improves Glucose Homeostasis via Intestinal Gluconeogenesis. *Cell Metab*, 2016. 24(1): p. 151–7. <https://doi.org/10.1016/j.cmet.2016.06.013> PMID: [27411015](https://pubmed.ncbi.nlm.nih.gov/27411015/)
76. Aragón-Vela J., et al., Impact of Exercise on Gut Microbiota in Obesity. *Nutrients*, 2021. 13(11). <https://doi.org/10.3390/nu13113999> PMID: [34836254](https://pubmed.ncbi.nlm.nih.gov/34836254/)
